# Supplementary figures and images for: USP15 Enhances the Proliferation, Migration, and Collagen Deposition of Hypertrophic Scar–Derived Fibroblasts by Deubiquitinating TGF-βR1 In Vitro
Source: PubMed Central journal article supplement — Plast Reconstr Surg. 2021 Sep 20;148(5):1040–51. doi: 10.1097/PRS.0000000000008488 (PMC8542080; doi:10.1097/prs.0000000000008488), 2021-09-20

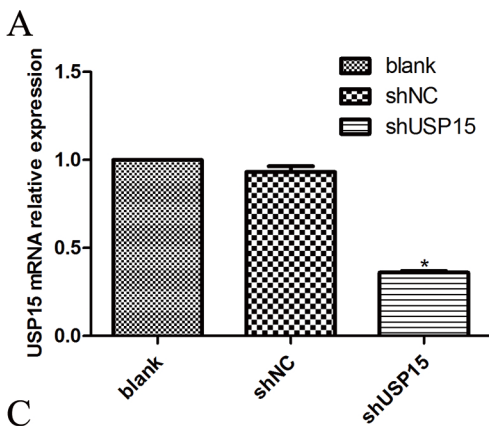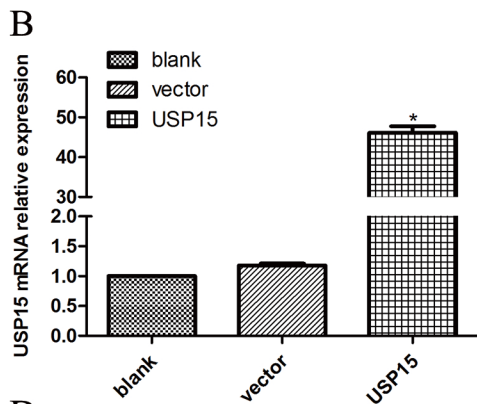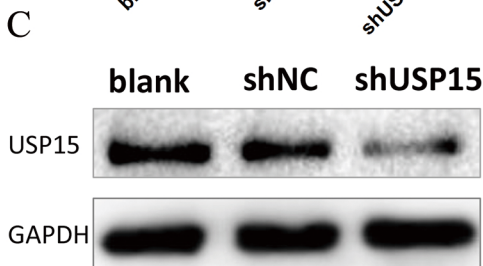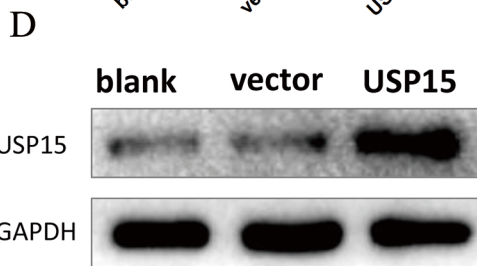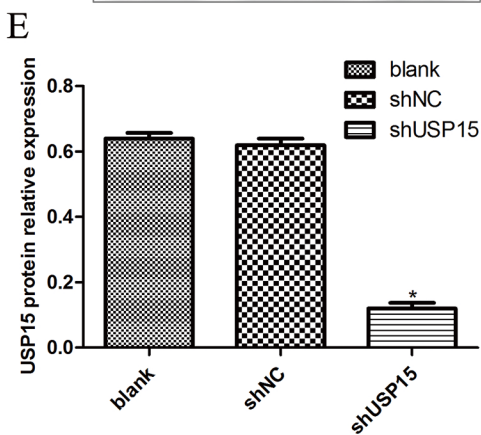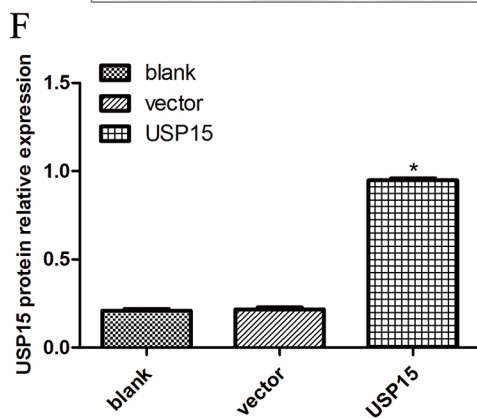

Supplement: prs-148-1040-s001.pdf [file prs-148-1040-s001.pdf]

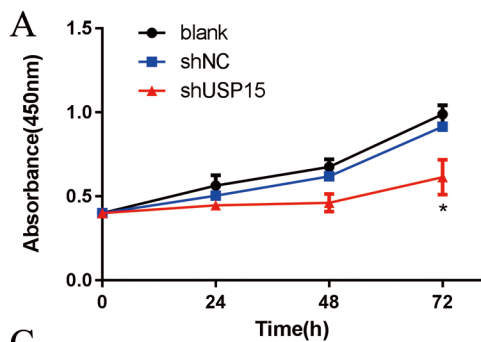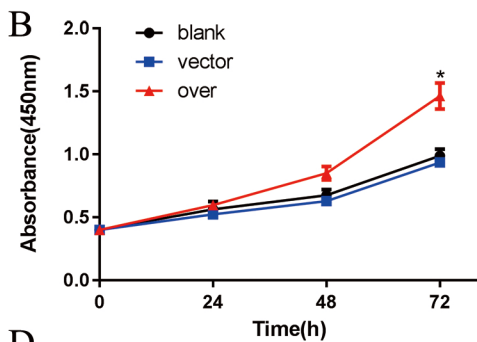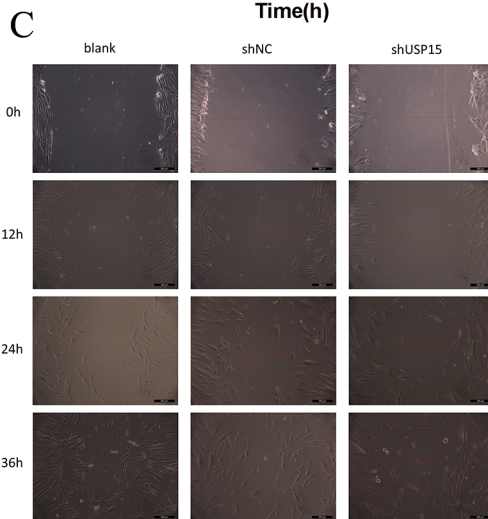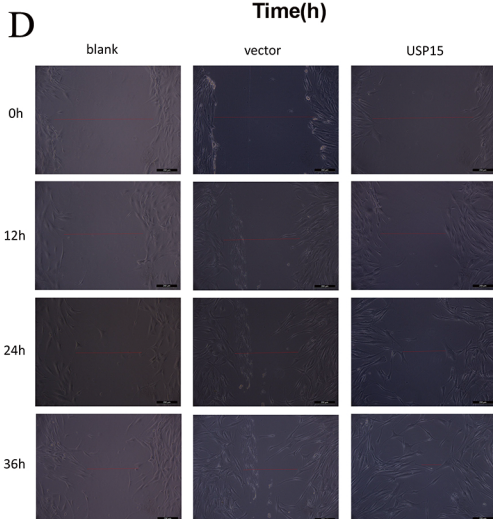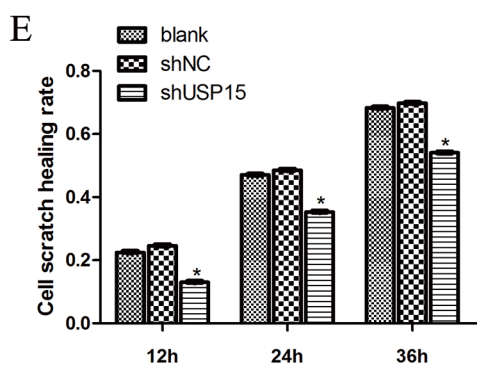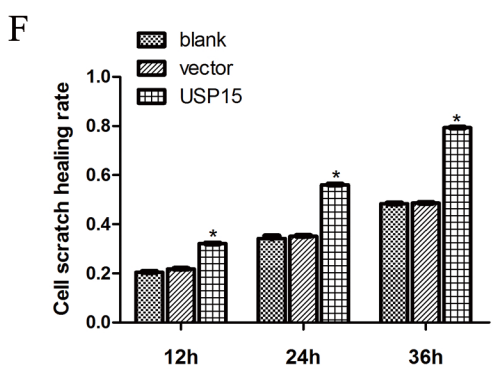

Supplement: prs-148-1040-s002.pdf [file prs-148-1040-s002.pdf]

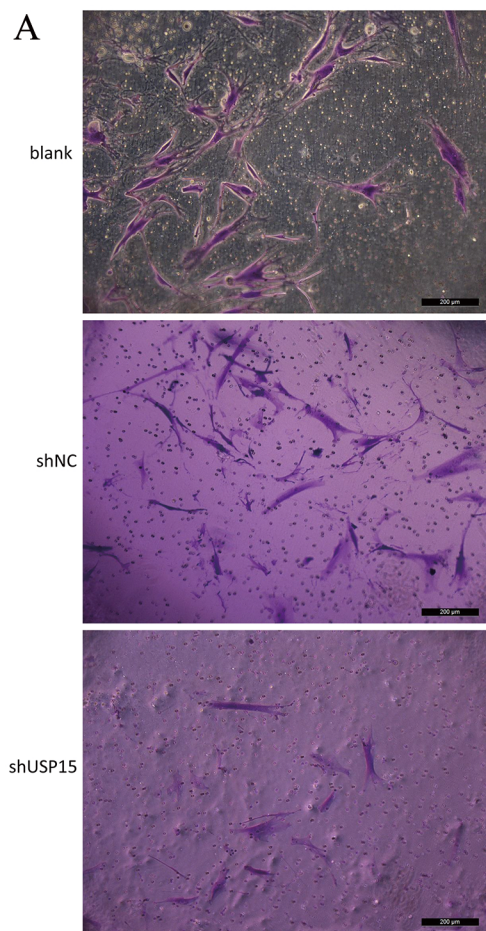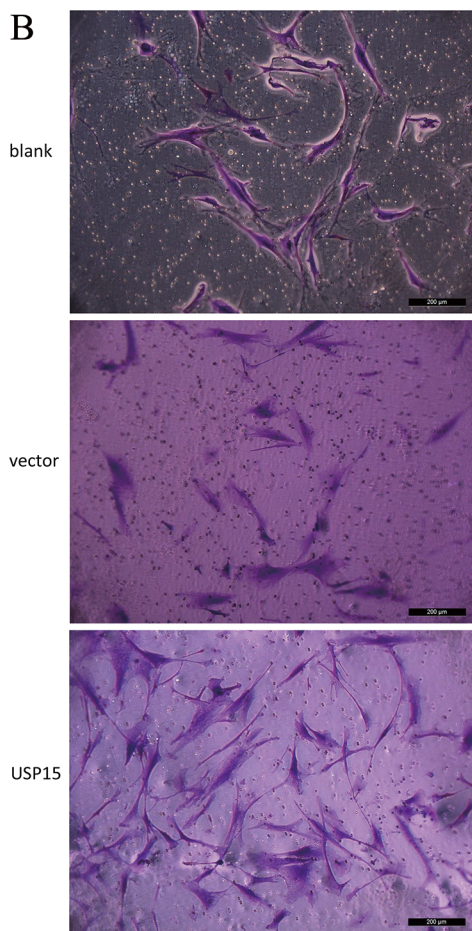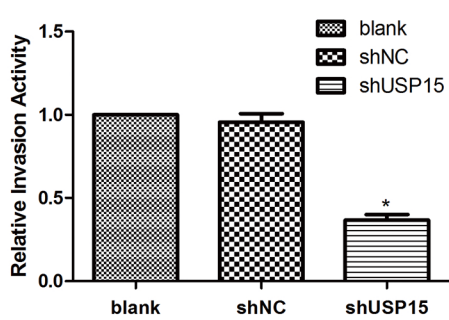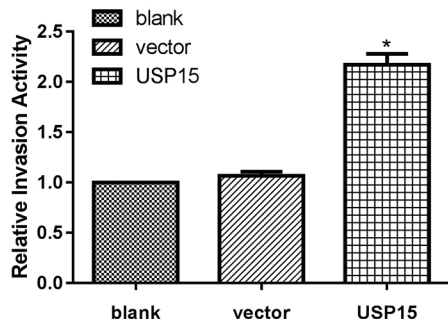

Supplement: prs-148-1040-s003.pdf [file prs-148-1040-s003.pdf]

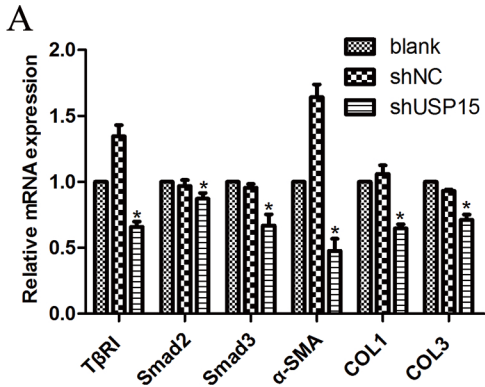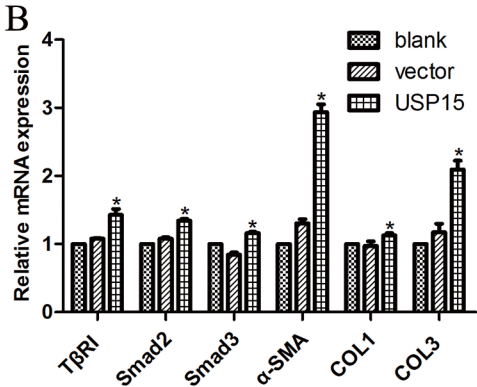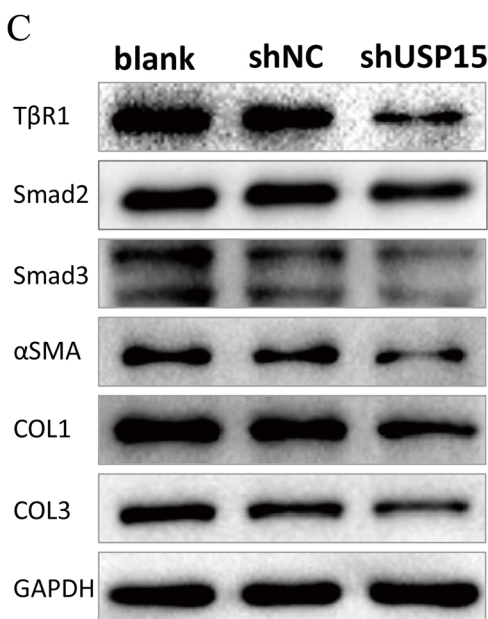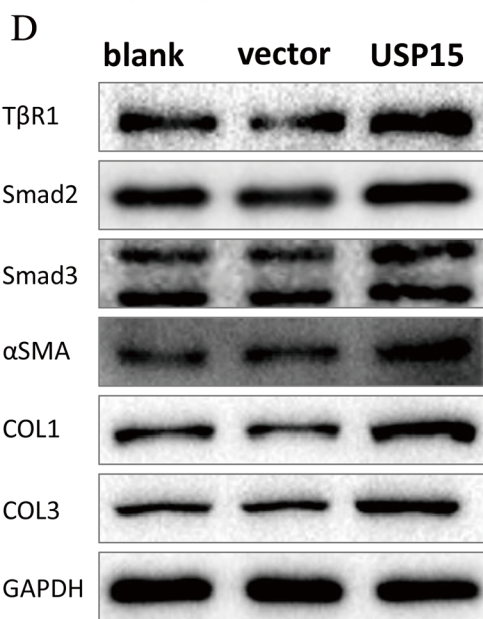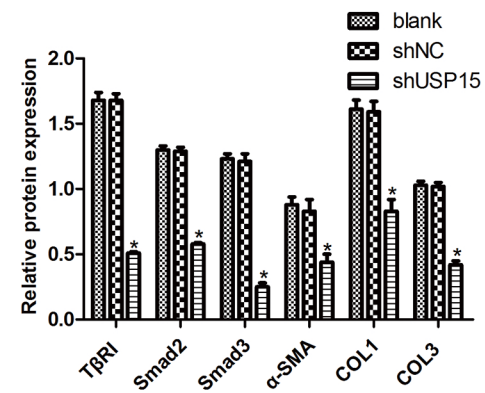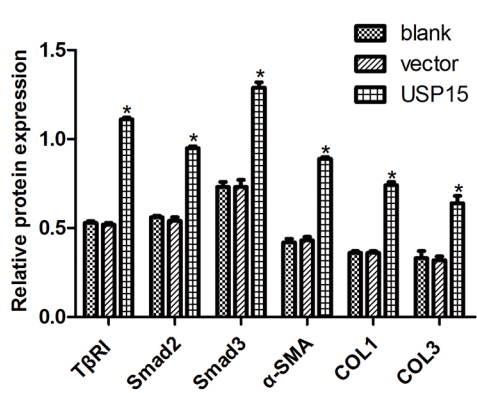

Supplement: prs-148-1040-s004.pdf [file prs-148-1040-s004.pdf]

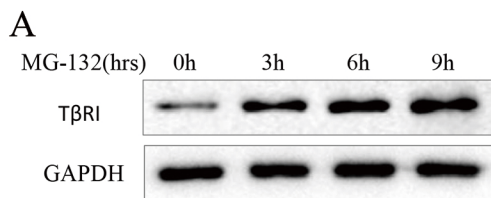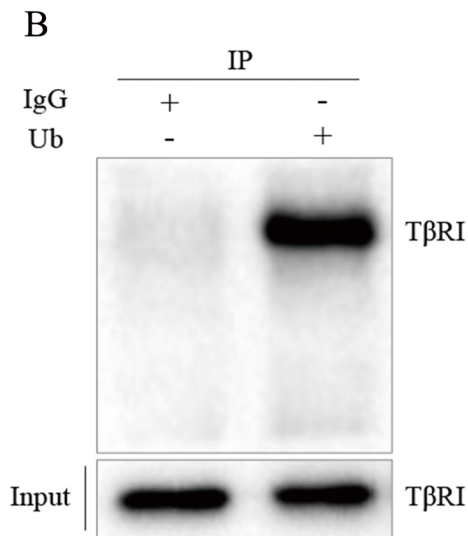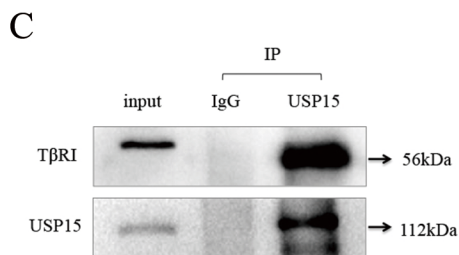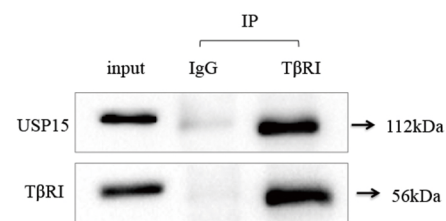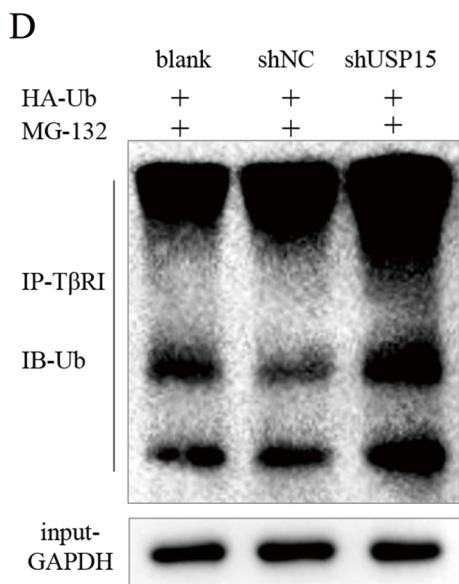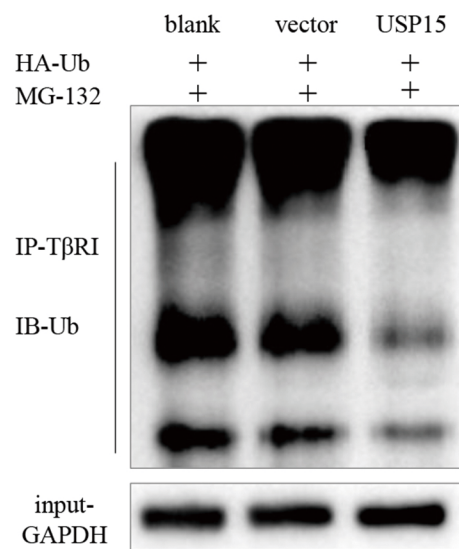

Supplement: prs-148-1040-s005.pdf [file prs-148-1040-s005.pdf]

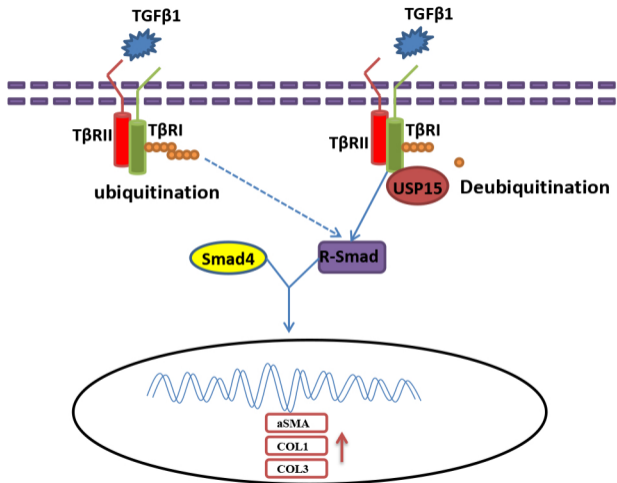

Supplement: prs-148-1040-s006.pdf [file prs-148-1040-s006.pdf]
